# Supplementary material for: External validation and recalibration of an incidental meningioma prognostic model – IMPACT: protocol for an international multicentre retrospective cohort study
Source: PubMed Central journal article supplement (PMC8768908; doi:10.1136/bmjopen-2021-052705), 2022-01-18
Supplement: bmjopen-2021-052705.reviewer_comments.pdf [file bmjopen-2021-052705.reviewer_comments.pdf]

## PEER REVIEW HISTORY

BMJ Open publishes all reviews undertaken for accepted manuscripts. Reviewers are asked to complete a checklist review form (<http://bmjopen.bmj.com/site/about/resources/checklist.pdf>) and are provided with free text boxes to elaborate on their assessment. These free text comments are reproduced below.

### ARTICLE DETAILS

|                            |                                                                                                                                                                                                                                                            |
|----------------------------|------------------------------------------------------------------------------------------------------------------------------------------------------------------------------------------------------------------------------------------------------------|
| <b>TITLE (PROVISIONAL)</b> | External validation and recalibration of an incidental meningioma prognostic model – IMPACT: protocol for an international multicentre retrospective cohort study                                                                                          |
| <b>AUTHORS</b>             | Islim, Abdurrahman; millward, Christopher; Piper, Rory; Fountain, Daniel; Mehta, Shaveta; Kolamunnage-Dona, Ruwanthi; Ali, Usama; Koszdin, Shelli; Georgious, Theo; Mills, Samantha; Brodbelt, Andrew; Mathew, Ryan; Santarius, Thomas; Jenkinson, Michael |

### VERSION 1 – REVIEW

|                        |                                                           |
|------------------------|-----------------------------------------------------------|
| <b>REVIEWER</b>        | Shu, Kai<br>Huazhong University of Science and Technology |
| <b>REVIEW RETURNED</b> | 22-Jul-2021                                               |

|                         |                                                                                                                                                                                                    |
|-------------------------|----------------------------------------------------------------------------------------------------------------------------------------------------------------------------------------------------|
| <b>GENERAL COMMENTS</b> | I have no objection against this manuscript. The study design is scientific and well-organised. I am also looking forward to the results of international multi-center validation of IMPACT model. |
|-------------------------|----------------------------------------------------------------------------------------------------------------------------------------------------------------------------------------------------|

|                        |                                                        |
|------------------------|--------------------------------------------------------|
| <b>REVIEWER</b>        | Gadelha Figueiredo, Eberval<br>University of Sao Paulo |
| <b>REVIEW RETURNED</b> | 26-Jul-2021                                            |

|                         |                                                   |
|-------------------------|---------------------------------------------------|
| <b>GENERAL COMMENTS</b> | This is a well written paper on a relevant topic. |
|-------------------------|---------------------------------------------------|

### VERSION 1 – AUTHOR RESPONSE

Reviewer: 1

Dr. Kai Shu, Huazhong University of Science and Technology

Comments to the Author:

I have no objection against this manuscript. The study design is scientific and well-organised. I am also looking forward to the results of international multi-center validation of IMPACT model.

Response: Thank you. No changes to address

Reviewer: 2

Dr. Eberval Gadelha Figueiredo, University of Sao Paulo

Comments to the Author:

This is a well written paper on a relevant topic.

Response: Thank you. No changes to address
