# Supplementary material for: External validation and recalibration of an incidental meningioma prognostic model – IMPACT: protocol for an international multicentre retrospective cohort study
Source: PubMed Central journal article supplement (PMC8768908; doi:10.1136/bmjopen-2021-052705), 2022-01-18
Supplement: bmjopen-2021-052705supp001.pdf [file bmjopen-2021-052705supp001.pdf]

## 1 APPENDICES

### 1.1. Appendix. 1. Guide for REDCap database developers

| Characteristic                                            | Options                                                                                                                                                                                                                                                                    | Notes                                                                                                                                                                                                              |
|-----------------------------------------------------------|----------------------------------------------------------------------------------------------------------------------------------------------------------------------------------------------------------------------------------------------------------------------------|--------------------------------------------------------------------------------------------------------------------------------------------------------------------------------------------------------------------|
| <b>BASELINE CLINICAL CHARACTERISTICS (PAGE/SECTION 1)</b> |                                                                                                                                                                                                                                                                            |                                                                                                                                                                                                                    |
| Age (years)                                               | Free field                                                                                                                                                                                                                                                                 | Required entry                                                                                                                                                                                                     |
| Sex                                                       | Dropdown list/check box <ul style="list-style-type: none"> <li>• Male</li> <li>• Female</li> </ul>                                                                                                                                                                         |                                                                                                                                                                                                                    |
| Ethnicity                                                 | Dropdown list/check box <ul style="list-style-type: none"> <li>• White</li> <li>• Mixed / Multiple ethnic groups</li> <li>• Asian / Asian British</li> <li>• Black / African / Caribbean / Black British</li> <li>• Other ethnic group</li> <li>• NA</li> </ul>            | Required entry. Allow one option only.<br><br>Other ethnic group prompts a free text box                                                                                                                           |
| Comorbidities                                             | Check box <ul style="list-style-type: none"> <li>• Hypertension - systolic &gt; 140 or diastolic &gt; 90 and patients on medical treatment</li> <li>• Previous myocardial infarction</li> <li>• Congestive heart failure</li> <li>• Peripheral vascular disease</li> </ul> | Required entry. Allow multiple options.<br><br>Note to data collector: Age and comorbidities will be used to calculate the age adjusted Charlson comorbidity index. Each of these is defined in the guide provided |

|                        |                                                                                                                                                                                                                                                                                                                                                                                                                                                                                                                                                                                                                                                                                                                                                                                                                                                           |                                       |
|------------------------|-----------------------------------------------------------------------------------------------------------------------------------------------------------------------------------------------------------------------------------------------------------------------------------------------------------------------------------------------------------------------------------------------------------------------------------------------------------------------------------------------------------------------------------------------------------------------------------------------------------------------------------------------------------------------------------------------------------------------------------------------------------------------------------------------------------------------------------------------------------|---------------------------------------|
|                        | <ul style="list-style-type: none"> <li>• Previous stroke/TIA - If hemiplegia present, do not check</li> <li>• Hemi/paraplegia</li> <li>• Diabetes which requires medical treatment</li> <li>• Diabetes with end-organ damage - if so, do not check diabetes that requires treatment</li> <li>• COPD/Asthma</li> <li>• Renal disease</li> <li>• Mild liver disease - Hep B/C or cirrhosis without portal hypertension</li> <li>• Moderate to severe liver disease - cirrhosis with portal hypertension, jaundice, ascites</li> <li>• Peptic ulcer disease</li> <li>• Cancer - excluding basal cell carcinoma</li> <li>• Metastatic cancer - if so, do not check cancer</li> <li>• Rheumatic or connective tissue disease</li> <li>• HIV/AIDS</li> <li>• Skin ulcers/cellulitis</li> <li>• Depression</li> <li>• Dementia</li> <li>• On Warfarin</li> </ul> |                                       |
| WHO Performance status | Dropdown list/check box <ul style="list-style-type: none"> <li>• 0</li> <li>• 1</li> <li>• 2</li> </ul>                                                                                                                                                                                                                                                                                                                                                                                                                                                                                                                                                                                                                                                                                                                                                   | Required entry. Allow one option only |

|                                                                                 |                                                                                                                                                                                                                                                                                                                                |                                                                                                                                                                                                                                                                                                   |
|---------------------------------------------------------------------------------|--------------------------------------------------------------------------------------------------------------------------------------------------------------------------------------------------------------------------------------------------------------------------------------------------------------------------------|---------------------------------------------------------------------------------------------------------------------------------------------------------------------------------------------------------------------------------------------------------------------------------------------------|
|                                                                                 | <ul style="list-style-type: none"> <li>• 3</li> <li>• 4</li> </ul>                                                                                                                                                                                                                                                             |                                                                                                                                                                                                                                                                                                   |
| Indication for scan                                                             | Dropdown list/check box <ul style="list-style-type: none"> <li>• Headache</li> <li>• Cerebrovascular accident</li> <li>• Head injury</li> <li>• Audiovestibular symptoms</li> <li>• Visual symptoms</li> <li>• Psychiatric symptoms</li> <li>• Cognitive symptoms</li> <li>• Loss of consciousness</li> <li>• Other</li> </ul> | Required entry. Allow multiple options.<br><br>Note to data collector: The meningioma must not be thought to be the cause of these symptoms. Other indications might include lethargy, research, sinusitis, anosmia...etc.<br><br>Other prompts a free text box                                   |
| <b>NUMBER OF MENINGIOMAS ON 1<sup>ST</sup> DIAGNOSTIC SCAN (PAGE/SECTION 2)</b> |                                                                                                                                                                                                                                                                                                                                |                                                                                                                                                                                                                                                                                                   |
| Initial scan date                                                               | DD/MM/YYYY                                                                                                                                                                                                                                                                                                                     | Required entry. YYYY can't be ≤2007 or ≥2011                                                                                                                                                                                                                                                      |
| How many meningiomas?                                                           | Check box <ul style="list-style-type: none"> <li>• Single</li> <li>• Multiple</li> </ul>                                                                                                                                                                                                                                       | Required entry<br><br>If a single meningioma, direct to section/page 3.<br><br>If multiple, prompt a new entry point (e.g. check box with options being 2-6) with number of meningiomas present. Each meningioma will then be treated as a separate entity with regards to the upcoming sections. |
| <b>BASELINE IMAGING CHARACTERISTICS (SECTION/PAGE 3)</b>                        |                                                                                                                                                                                                                                                                                                                                |                                                                                                                                                                                                                                                                                                   |
| Meningioma signal intensity on T2                                               | Dropdown list/check box <ul style="list-style-type: none"> <li>• Hypointense</li> <li>• Hyperintense</li> <li>• Isointense</li> <li>• NA</li> </ul>                                                                                                                                                                            | Required entry. Allow one option only<br><br>Note to data collector: In relation to the contralateral grey matter. If only baseline CT available, NA                                                                                                                                              |

|                                        |                                                                                                                                                                                                                      |                                                                                                                                                                                                                                                   |
|----------------------------------------|----------------------------------------------------------------------------------------------------------------------------------------------------------------------------------------------------------------------|---------------------------------------------------------------------------------------------------------------------------------------------------------------------------------------------------------------------------------------------------|
| Meningioma signal intensity on FLAIR   | Dropdown list/check box <ul style="list-style-type: none"> <li>• Hypointense</li> <li>• Hyperintense</li> <li>• Isointense</li> <li>• NA</li> </ul>                                                                  | Required entry. Allow one option only<br><br>Note to data collector: In relation to the contralateral grey matter. If only baseline CT available, NA                                                                                              |
| Peritumoural signal intensity on T2    | Dropdown list/check box <ul style="list-style-type: none"> <li>• 0-5%</li> <li>• 6-33%</li> <li>• 34-66%</li> <li>• 67-100%</li> <li>• NA</li> </ul>                                                                 | Required entry. Allow one option only<br><br>Note to data collector: In relation to tumour volume. If only baseline CT available, NA                                                                                                              |
| Peritumoural signal intensity on FLAIR | Dropdown list: <ul style="list-style-type: none"> <li>• 0-5%</li> <li>• 6-33%</li> <li>• 34-66%</li> <li>• 67-100%</li> <li>• NA</li> </ul>                                                                          | Required entry. Allow one option only<br><br>Note to data collector: In relation to tumour volume. If only baseline CT available, NA                                                                                                              |
| Venous sinus nearby                    | Checkbox                                                                                                                                                                                                             | Required entry.<br><br>Note to data collector: Tick box if within 10 mm, in direct contact or invading one of: superior sagittal sinus (SSS), sigmoid sinus (SS), transverse sinus (TS), cavernous sinus (CS) and the confluence of sinuses (CoS) |
| If yes, specify                        | Dropdown list/check box <ul style="list-style-type: none"> <li>• Superior sagittal sinus</li> <li>• Cavernous sinus</li> <li>• Sigmoid sinus</li> <li>• Transverse sinus</li> <li>• Confluence of sinuses</li> </ul> | Prompt entry if previous option (venous sinus nearby) has been ticked. Allow one option only.                                                                                                                                                     |
| Separate, direct contact or invaded?   | Dropdown list/check box <ul style="list-style-type: none"> <li>• Separate</li> </ul>                                                                                                                                 | Prompt entry if previous option (venous sinus nearby) has been ticked. Allow one option only                                                                                                                                                      |

|                                                     |                                                                                                                                                                                                                                                                                                                                                                                                                                   |                                                                                                                   |
|-----------------------------------------------------|-----------------------------------------------------------------------------------------------------------------------------------------------------------------------------------------------------------------------------------------------------------------------------------------------------------------------------------------------------------------------------------------------------------------------------------|-------------------------------------------------------------------------------------------------------------------|
|                                                     | <ul style="list-style-type: none"> <li>• Direct contact</li> <li>• Invaded</li> </ul>                                                                                                                                                                                                                                                                                                                                             |                                                                                                                   |
| In contact with critical neuro-vascular structures? | Checkbox                                                                                                                                                                                                                                                                                                                                                                                                                          | Required entry                                                                                                    |
| If yes, which                                       | Dropdown list/check box <ul style="list-style-type: none"> <li>• Internal carotid artery</li> <li>• Basilar artery</li> <li>• Vertebral artery</li> <li>• Middle cerebral artery</li> <li>• Anterior cerebral artery</li> <li>• Posterior cerebral artery</li> <li>• Optic apparatus (optic nerve and chiasm)</li> <li>• Trigeminal nerve</li> <li>• Facial nerve</li> <li>• Vestibulo-cochlear nerve</li> <li>• Other</li> </ul> | Prompt entry if previous option (In contact with critical neuro-vascular structures?) has been ticked             |
| Major axis (mm)                                     | Free field                                                                                                                                                                                                                                                                                                                                                                                                                        | Required entry<br><br>Note to data collector: In mm to 1 dp. Measure on axial T1/CT + GAD                         |
| Minor axis (mm)                                     | Free field                                                                                                                                                                                                                                                                                                                                                                                                                        | Required entry<br><br>Note to data collector: In mm to 1 dp. Perpendicular to the major axis on axial T1/CT + GAD |
| Cor/sag major axis                                  | Free field                                                                                                                                                                                                                                                                                                                                                                                                                        | Require entry<br><br>Note to data collector: In mm to 1 dp. Maximum height                                        |
| Location                                            | Dropdown list/Check box <ul style="list-style-type: none"> <li>• Convexity</li> <li>• Parasagittal</li> <li>• Parafalcine</li> </ul>                                                                                                                                                                                                                                                                                              | Required entry. Allow one option only<br><br>Note to data collector: as per ICOM classification (appendix 2)      |

|                                             |                                                                                                                                                                                                                                                                                                                                                                                                                                                                                                                               |                                                                                                                                                                                           |
|---------------------------------------------|-------------------------------------------------------------------------------------------------------------------------------------------------------------------------------------------------------------------------------------------------------------------------------------------------------------------------------------------------------------------------------------------------------------------------------------------------------------------------------------------------------------------------------|-------------------------------------------------------------------------------------------------------------------------------------------------------------------------------------------|
|                                             | <ul style="list-style-type: none"> <li>• Sphenoid wing</li> <li>• Anterior midline</li> <li>• Post fossa-midline</li> <li>• Post fossa-lateral &amp; posterior</li> <li>• Tentorial</li> <li>• Intraventricular</li> <li>• Pineal region</li> </ul>                                                                                                                                                                                                                                                                           |                                                                                                                                                                                           |
| Location subcategory                        | <p>Dropdown list/Check box</p> <ul style="list-style-type: none"> <li>• Anterior</li> <li>• Posterior</li> <li>• Falco-tentorial</li> <li>• Lateral</li> <li>• Medial (including ACP)</li> <li>• Cribriform plate/olfactory groove</li> <li>• Planum</li> <li>• Tuberculum/diaphragma sellae</li> <li>• Clival</li> <li>• Petro-clival</li> <li>• Anterior foramen magnum</li> <li>• Petrous</li> <li>• Squamous occipital</li> <li>• Posterior foramen magnum</li> <li>• Supratentorial</li> <li>• Infratentorial</li> </ul> | <p>Required entry. Allow one option only</p> <p>Note to data collector: ICOM classification (appendix 2)</p> <p>Appropriate subcategories will appear based on main category selected</p> |
| Side                                        | <p>Dropdown list/check box</p> <ul style="list-style-type: none"> <li>• Right</li> <li>• Left</li> <li>• Midline</li> </ul>                                                                                                                                                                                                                                                                                                                                                                                                   | <p>Required entry. Allow one option only</p>                                                                                                                                              |
| <b>MANAGEMENT DECISION (PAGE/SECTION 4)</b> |                                                                                                                                                                                                                                                                                                                                                                                                                                                                                                                               |                                                                                                                                                                                           |

|                                           |                                                                                                                                                                                                                                                     |                                                                                                                                                                                                                                                                                                                                             |
|-------------------------------------------|-----------------------------------------------------------------------------------------------------------------------------------------------------------------------------------------------------------------------------------------------------|---------------------------------------------------------------------------------------------------------------------------------------------------------------------------------------------------------------------------------------------------------------------------------------------------------------------------------------------|
| Decision                                  | Dropdown list/Check box <ul style="list-style-type: none"> <li>• Active monitoring</li> <li>• Surgery</li> <li>• SRS</li> <li>• fRT</li> <li>• Discharge from outpatient care</li> <li>• <u>Lost to follow-up</u></li> <li>• <u>Dead</u></li> </ul> | Required entry. Allow one option only<br><br>Note to data collector: You will be directed to the relevant page/section dependent on the choice. If the patient died or was lost to follow-up after this point in time, please choose one of the last two options, albeit the intention might have been to continue monitoring or intervene. |
| <b>ACTIVE MONITORING (SECTION/PAGE 5)</b> |                                                                                                                                                                                                                                                     |                                                                                                                                                                                                                                                                                                                                             |
| Scan date                                 | DD/MM/YYYY                                                                                                                                                                                                                                          | Required entry                                                                                                                                                                                                                                                                                                                              |
| Peritumoural signal intensity on T2       | Dropdown list/check box <ul style="list-style-type: none"> <li>• 0-5%</li> <li>• 6-33%</li> <li>• 34-66%</li> <li>• 67-100%</li> <li>• NA</li> </ul>                                                                                                | Required entry. Allow one option only<br><br>Note to data collector: In relation to tumour volume on T2/FLAIR MRI. If only CT or T1 MRI available, NA                                                                                                                                                                                       |
| Peritumoural signal intensity on FLAIR    | Dropdown list/check box <ul style="list-style-type: none"> <li>• 0-5%</li> <li>• 6-33%</li> <li>• 34-66%</li> <li>• 67-100%</li> <li>• NA</li> </ul>                                                                                                | Required entry. Allow one option only<br><br>Note to data collector: In relation to tumour volume on FLAIR MRI. If only CT or T1 MRI available, NA                                                                                                                                                                                          |
| Venous sinus nearby                       | Checkbox                                                                                                                                                                                                                                            | Required entry.<br><br>Note to data collector: Tick box if within 10 mm, in direct contact or invading one of: superior sagittal sinus (SSS), sigmoid sinus (SS), transverse sinus (TS), cavernous sinus (CS) and the confluence of sinuses (CoS)                                                                                           |
| If yes, specify                           | Dropdown list/check box                                                                                                                                                                                                                             | Prompt entry if previous option (venous sinus nearby) has been ticked. Allow one option only                                                                                                                                                                                                                                                |

|                                      |                                                                                                                                                                                                       |                                                                                                                                |
|--------------------------------------|-------------------------------------------------------------------------------------------------------------------------------------------------------------------------------------------------------|--------------------------------------------------------------------------------------------------------------------------------|
|                                      | <ul style="list-style-type: none"> <li>• Superior sagittal sinus</li> <li>• Cavernous sinus</li> <li>• Sigmoid sinus</li> <li>• Transverse sinus</li> <li>• Confluence of sinuses</li> </ul>          |                                                                                                                                |
| Separate, direct contact or invaded? | Dropdown list/check box <ul style="list-style-type: none"> <li>• Separate</li> <li>• Direct contact</li> <li>• Invaded</li> </ul>                                                                     | Prompt entry if previous option (venous sinus nearby) has been ticked. Allow one option only                                   |
| Any new meningioma-related symptoms? | Checkbox                                                                                                                                                                                              | Required entry                                                                                                                 |
| If yes, specify domain               | Dropdown list/check box <ul style="list-style-type: none"> <li>• Seizure</li> <li>• Headache</li> <li>• Motor</li> <li>• Sensory</li> <li>• Language</li> <li>• Cognitive</li> <li>• Other</li> </ul> | Prompt entry if previous option (Any new meningioma-related symptoms?) has been ticked. Allow multiple options                 |
| Major axis (mm)                      | Free field                                                                                                                                                                                            | Required entry<br><br>Note to data collector: In mm to 1 dp. Measure on axial T1/CT + GAD if available                         |
| Minor axis (mm)                      | Free field                                                                                                                                                                                            | Required entry<br><br>Note to data collector: In mm to 1 dp. Perpendicular to the major axis on axial T1/CT + GAD if available |
| Cor/sag major axis (mm)              | Free field                                                                                                                                                                                            | Required entry<br><br>Note to data collector: In mm to 1 dp. Maximum height                                                    |



|                                 |                                                                                                                                                                                                                                                   |                                                                                                                                                                                                                                                                                                                                                                                                                                                                                                           |
|---------------------------------|---------------------------------------------------------------------------------------------------------------------------------------------------------------------------------------------------------------------------------------------------|-----------------------------------------------------------------------------------------------------------------------------------------------------------------------------------------------------------------------------------------------------------------------------------------------------------------------------------------------------------------------------------------------------------------------------------------------------------------------------------------------------------|
| Outcome                         | Dropdown list/check box <ul style="list-style-type: none"> <li>• Resume follow-up (active monitoring)</li> <li>• Surgery</li> <li>• SRS</li> <li>• fRT</li> <li>• Discharge</li> <li>• <u>Lost to follow-up</u></li> <li>• <u>Dead</u></li> </ul> | Required entry. Allow one option only<br><br>Note to data collector: You will be directed to the relevant page/section dependent on the choice. If the patient died or was lost to follow-up after this interval scan, please choose one of the last two options, albeit the intention might have been to continue monitoring or intervene. If the option you choose is set to take place in the future, choose the option, save the data entered and exit the form with no further information required. |
| <b>SURGERY (SECTION/PAGE 6)</b> |                                                                                                                                                                                                                                                   |                                                                                                                                                                                                                                                                                                                                                                                                                                                                                                           |
| Surgery date                    | DD/MM/YYYY                                                                                                                                                                                                                                        | Required entry                                                                                                                                                                                                                                                                                                                                                                                                                                                                                            |
| Indication for intervention     | Dropdown list/checkbox <ul style="list-style-type: none"> <li>• Clinical-radiological</li> <li>• Clinical</li> <li>• Radiological</li> <li>• Patient preference</li> </ul>                                                                        | Required entry. Allow one option only                                                                                                                                                                                                                                                                                                                                                                                                                                                                     |
| Preoperative WHO PS             | Dropdown list/checkbox <ul style="list-style-type: none"> <li>• 0</li> <li>• 1</li> <li>• 2</li> <li>• 3</li> <li>• 4</li> </ul>                                                                                                                  | Required entry. Allow one option only                                                                                                                                                                                                                                                                                                                                                                                                                                                                     |
| Preoperative comorbidities      | Check box <ul style="list-style-type: none"> <li>• Hypertension - systolic &gt; 140 or diastolic &gt; 90 and patients on medical treatment</li> <li>• Previous myocardial infarction</li> <li>• Congestive heart failure</li> </ul>               | Required entry. Allow multiple options.<br><br>Note to data collector: Age and comorbidities will be used to calculate the age adjusted Charlson comorbidity index. Each of these is defined in the guide provided                                                                                                                                                                                                                                                                                        |

|               |                                                                                                                                                                                                                                                                                                                                                                                                                                                                                                                                                                                                                                                                                                                                                                                                                                                                                                  |                                       |
|---------------|--------------------------------------------------------------------------------------------------------------------------------------------------------------------------------------------------------------------------------------------------------------------------------------------------------------------------------------------------------------------------------------------------------------------------------------------------------------------------------------------------------------------------------------------------------------------------------------------------------------------------------------------------------------------------------------------------------------------------------------------------------------------------------------------------------------------------------------------------------------------------------------------------|---------------------------------------|
|               | <ul style="list-style-type: none"> <li>• Peripheral vascular disease</li> <li>• Previous stroke/TIA - If hemiplegia present, do not check</li> <li>• Hemi/paraplegia</li> <li>• Diabetes which requires medical treatment</li> <li>• Diabetes with end-organ damage - if so, do not check diabetes that requires treatment</li> <li>• COPD/Asthma</li> <li>• Renal disease</li> <li>• Mild liver disease - Hep B/C or cirrhosis without portal hypertension</li> <li>• Moderate to severe liver disease - cirrhosis with portal hypertension, jaundice, ascites</li> <li>• Peptic ulcer disease</li> <li>• Cancer - excluding basal cell carcinoma</li> <li>• Metastatic cancer - if so, do not check cancer</li> <li>• Rheumatic or connective tissue disease</li> <li>• HIV/AIDS</li> <li>• Skin ulcers/cellulitis</li> <li>• Depression</li> <li>• Dementia</li> <li>• On Warfarin</li> </ul> |                                       |
| Simpson grade | Dropdown list/check box <ul style="list-style-type: none"> <li>• 1-GTR</li> <li>• 2-GTR</li> </ul>                                                                                                                                                                                                                                                                                                                                                                                                                                                                                                                                                                                                                                                                                                                                                                                               | Required entry. Allow one option only |

|                                      |                                                                                                                                                                                                                                                                                |                                                                                                                                                                                                                                                                                                                                                                                                                                                                                                                                                                                                                                                                |
|--------------------------------------|--------------------------------------------------------------------------------------------------------------------------------------------------------------------------------------------------------------------------------------------------------------------------------|----------------------------------------------------------------------------------------------------------------------------------------------------------------------------------------------------------------------------------------------------------------------------------------------------------------------------------------------------------------------------------------------------------------------------------------------------------------------------------------------------------------------------------------------------------------------------------------------------------------------------------------------------------------|
|                                      | <ul style="list-style-type: none"> <li>• 3-GTR</li> <li>• 4-STR</li> <li>• 5-STR</li> </ul>                                                                                                                                                                                    |                                                                                                                                                                                                                                                                                                                                                                                                                                                                                                                                                                                                                                                                |
| WHO grade at the time of surgery     | Dropdown list/check box <ul style="list-style-type: none"> <li>• 1</li> <li>• 2</li> <li>• 3</li> </ul>                                                                                                                                                                        | Required entry. Allow one option only<br><br>Note to data collector: According to the WHO classification at the time of surgery                                                                                                                                                                                                                                                                                                                                                                                                                                                                                                                                |
| Microscopic brain invasion           | Dropdown list/checkbox <ul style="list-style-type: none"> <li>• Yes</li> <li>• No</li> <li>• Brain tissue absent</li> <li>• NA</li> </ul>                                                                                                                                      | Required entry. Allow one option only<br><br>Note to data collector: as described in the pathology report.                                                                                                                                                                                                                                                                                                                                                                                                                                                                                                                                                     |
| Updated WHO grade (2016)             | Dropdown list/check box <ul style="list-style-type: none"> <li>• 1</li> <li>• 2</li> <li>• 3</li> <li>• NA</li> </ul>                                                                                                                                                          | Required entry. Allow one option only. Only to appear if date of surgery <2017<br><br>Note to data collector: For meningiomas operated prior to 2016, grading will have been done according to the 2007 classification. The 2016 version can upgrade WHO grade 1 meningiomas to grade 2 if microscopic brain invasion is present. This means that WHO grade 2 and 3 meningiomas remain unchanged. Grade 1 meningiomas on the other hand can be upgraded in the presence of brain invasion. This requires review by a pathologist and so if not feasible, choose NA. For meningiomas classed according to the 2016 WHO classification, grade remains unchanged. |
| Postoperative complications surgical | Checkbox                                                                                                                                                                                                                                                                       | Required                                                                                                                                                                                                                                                                                                                                                                                                                                                                                                                                                                                                                                                       |
| Complication                         | Dropdown list/check box <ul style="list-style-type: none"> <li>• Haemorrhage</li> <li>• Hydrocephalus</li> <li>• Surgical site infection - superficial and deep incisiona</li> <li>• Surgical site infection - intracranial (meningitis, ventriculitis and abscess)</li> </ul> | Prompt entry if previous option (Postoperative surgical complications) has been ticked<br><br>Allow more the one option                                                                                                                                                                                                                                                                                                                                                                                                                                                                                                                                        |

|                                          |                                                                                                                                                                                                                             |                                                                                                                                                                                                                                                                                                                                                                                                                                                    |
|------------------------------------------|-----------------------------------------------------------------------------------------------------------------------------------------------------------------------------------------------------------------------------|----------------------------------------------------------------------------------------------------------------------------------------------------------------------------------------------------------------------------------------------------------------------------------------------------------------------------------------------------------------------------------------------------------------------------------------------------|
|                                          | <ul style="list-style-type: none"> <li>• Stroke</li> <li>• CSF leak</li> <li>• Other</li> </ul>                                                                                                                             |                                                                                                                                                                                                                                                                                                                                                                                                                                                    |
| New or worsening neurological impairment | Checkbox                                                                                                                                                                                                                    | <p>Prompt entry if previous option (Postoperative surgical complications) has been ticked</p> <p>Note to data collector: If symptoms present tick box. Note that some patients will have a radiological haemorrhage on postoperative imaging with no symptoms. Include these but don't tick clinical manifestation. On the other hand, some patients will have new symptoms such as seizure with no radiological cause, include these as well.</p> |
| Clinical manifestation                   | Dropdown list/checkbox <ul style="list-style-type: none"> <li>• Seizure</li> <li>• Headache</li> <li>• Motor</li> <li>• Sensory</li> <li>• Language</li> <li>• Cognitive</li> <li>• Reduced GCS</li> <li>• Other</li> </ul> | <p>Prompt entry if previous option (New or worsening neurological impairment) has been ticked. Allow multiple options</p>                                                                                                                                                                                                                                                                                                                          |
| Pharmacological intervention             | Checkbox                                                                                                                                                                                                                    | Prompt entry if previous option (Postoperative surgical complications) has been ticked                                                                                                                                                                                                                                                                                                                                                             |
| Surgical intervention                    | Dropdown list/checkbox <ul style="list-style-type: none"> <li>• No</li> <li>• Without GA</li> <li>• Under GA</li> </ul>                                                                                                     | Prompt entry if previous option (Postoperative surgical complications) has been ticked                                                                                                                                                                                                                                                                                                                                                             |
| ICU admission                            | Checkbox                                                                                                                                                                                                                    | Prompt entry if previous option (Postoperative surgical complications) has been ticked                                                                                                                                                                                                                                                                                                                                                             |
| Organ failure                            | Dropdown list/checkbox <ul style="list-style-type: none"> <li>• None</li> <li>• Single-organ</li> <li>• Multi-organ</li> </ul>                                                                                              | Prompt entry if previous option (Postoperative surgical complications) has been ticked. Allow one option only                                                                                                                                                                                                                                                                                                                                      |

|                                               |                                                                                                                                                                                                                                                                                                 |                                                                                                                         |
|-----------------------------------------------|-------------------------------------------------------------------------------------------------------------------------------------------------------------------------------------------------------------------------------------------------------------------------------------------------|-------------------------------------------------------------------------------------------------------------------------|
| Persisted with no improvement beyond 30 days? | Checkbox                                                                                                                                                                                                                                                                                        | Prompt entry if previous option (Postoperative surgical complications) has been ticked                                  |
| Postoperative medical complications           | checkbox                                                                                                                                                                                                                                                                                        | Required                                                                                                                |
| Complication                                  | Dropdown list/check box <ul style="list-style-type: none"> <li>• Myocardial infarction</li> <li>• Arrhythmia</li> <li>• Pneumonia</li> <li>• Pulmonary embolism</li> <li>• Deep venous thrombosis</li> <li>• Urinary tract infection</li> <li>• Acute kidney injury</li> <li>• Other</li> </ul> | Prompt entry if previous option (Postoperative medical complications) has been ticked<br><br>Allow more than one option |
| Pharmacological intervention                  | Checkbox                                                                                                                                                                                                                                                                                        | Prompt entry if previous option (Postoperative medical complications) has been ticked                                   |
| Surgical intervention                         | Dropdown list/checkbox <ul style="list-style-type: none"> <li>• No</li> <li>• Without GA</li> <li>• Under GA</li> </ul>                                                                                                                                                                         | Prompt entry if previous option (Postoperative medical complications) has been ticked                                   |
| ICU admission                                 | Checkbox                                                                                                                                                                                                                                                                                        | Prompt entry if previous option (Postoperative medical complications) has been ticked                                   |
| Organ failure                                 | Dropdown list/checkbox <ul style="list-style-type: none"> <li>• None</li> <li>• Single-organ</li> <li>• Multi-organ</li> </ul>                                                                                                                                                                  | Prompt entry if previous option (Postoperative medical complications) has been ticked. Allow one option only            |
| Persisted with no improvement beyond 30 days? | Checkbox                                                                                                                                                                                                                                                                                        | Prompt entry if previous option (Postoperative medical complications) has been ticked                                   |
| Postoperative WHO PS                          | Dropdown list/checkbox <ul style="list-style-type: none"> <li>• 0</li> </ul>                                                                                                                                                                                                                    | Required. Allow one option only                                                                                         |

|                                                                   |                                                                                                                                                                                                                                                                               |                                                                                                                                                                                                                    |
|-------------------------------------------------------------------|-------------------------------------------------------------------------------------------------------------------------------------------------------------------------------------------------------------------------------------------------------------------------------|--------------------------------------------------------------------------------------------------------------------------------------------------------------------------------------------------------------------|
|                                                                   | <ul style="list-style-type: none"> <li>• 1</li> <li>• 2</li> <li>• 3</li> <li>• 4</li> <li>• 5 (dead)</li> </ul>                                                                                                                                                              |                                                                                                                                                                                                                    |
| Recurrence                                                        | Checkbox                                                                                                                                                                                                                                                                      | Prompt entry if previous option (Postoperative WHO PS) is not 5                                                                                                                                                    |
| Scan date (at recurrence or last follow-up date if no recurrence) | DD/MM/YYYY                                                                                                                                                                                                                                                                    | Prompt entry if previous option (Postoperative WHO PS) is not 5                                                                                                                                                    |
| WHO PS at time of recurrence/last follow-up                       | Dropdown list/checkbox<br><ul style="list-style-type: none"> <li>• 0</li> <li>• 1</li> <li>• 2</li> <li>• 3</li> <li>• 4</li> </ul>                                                                                                                                           | Prompt entry if previous option (Postoperative WHO PS) is not 5                                                                                                                                                    |
| <b>SRS (SECTION/PAGE 7)</b>                                       |                                                                                                                                                                                                                                                                               |                                                                                                                                                                                                                    |
| Pre-radiation WHO PS                                              | Dropdown list/check box<br><ul style="list-style-type: none"> <li>• 0</li> <li>• 1</li> <li>• 2</li> <li>• 3</li> <li>• 4</li> </ul>                                                                                                                                          | Required entry. Allow one option only                                                                                                                                                                              |
| Pre-radiation comorbidity                                         | Check box<br><ul style="list-style-type: none"> <li>• Hypertension - systolic &gt; 140 or diastolic &gt; 90 and patients on medical treatment</li> <li>• Previous myocardial infarction</li> <li>• Congestive heart failure</li> <li>• Peripheral vascular disease</li> </ul> | Required entry. Allow multiple options.<br><br>Note to data collector: Age and comorbidities will be used to calculate the age adjusted Charlson comorbidity index. Each of these is defined in the guide provided |

|                                  |                                                                                                                                                                                                                                                                                                                                                                                                                                                                                                                                                                                                                                                                                                                                                                                                                                                           |                |
|----------------------------------|-----------------------------------------------------------------------------------------------------------------------------------------------------------------------------------------------------------------------------------------------------------------------------------------------------------------------------------------------------------------------------------------------------------------------------------------------------------------------------------------------------------------------------------------------------------------------------------------------------------------------------------------------------------------------------------------------------------------------------------------------------------------------------------------------------------------------------------------------------------|----------------|
|                                  | <ul style="list-style-type: none"> <li>• Previous stroke/TIA - If hemiplegia present, do not check</li> <li>• Hemi/paraplegia</li> <li>• Diabetes which requires medical treatment</li> <li>• Diabetes with end-organ damage - if so, do not check diabetes that requires treatment</li> <li>• COPD/Asthma</li> <li>• Renal disease</li> <li>• Mild liver disease - Hep B/C or cirrhosis without portal hypertension</li> <li>• Moderate to severe liver disease - cirrhosis with portal hypertension, jaundice, ascites</li> <li>• Peptic ulcer disease</li> <li>• Cancer - excluding basal cell carcinoma</li> <li>• Metastatic cancer - if so, do not check cancer</li> <li>• Rheumatic or connective tissue disease</li> <li>• HIV/AIDS</li> <li>• Skin ulcers/cellulitis</li> <li>• Depression</li> <li>• Dementia</li> <li>• On Warfarin</li> </ul> |                |
| Dose                             | Free field                                                                                                                                                                                                                                                                                                                                                                                                                                                                                                                                                                                                                                                                                                                                                                                                                                                | Required entry |
| Early CTCAE toxicity (≤3 months) | Checkbox                                                                                                                                                                                                                                                                                                                                                                                                                                                                                                                                                                                                                                                                                                                                                                                                                                                  | Required entry |

|                                                                     |                                                                                                                                                         |                                                                                                                                                                                                                                                                                                                                                                                                                                                                   |
|---------------------------------------------------------------------|---------------------------------------------------------------------------------------------------------------------------------------------------------|-------------------------------------------------------------------------------------------------------------------------------------------------------------------------------------------------------------------------------------------------------------------------------------------------------------------------------------------------------------------------------------------------------------------------------------------------------------------|
| Toxicity                                                            | Free field                                                                                                                                              | Prompt entry if previous option (Early CTCAE toxicity (≤3 months)) is ticked<br><br>Note to data collector:<br><a href="https://ctep.cancer.gov/protocoldevelopment/electronic_applications/ctc.htm">https://ctep.cancer.gov/protocoldevelopment/electronic_applications/ctc.htm</a><br><br>Use the following format: System class organ (SOC)-CTCAE term-grade e.g. nervous system disorders-headache-1. Select the complication with the highest toxicity grade |
| Late CTCAE toxicity                                                 | Checkbox                                                                                                                                                | Required entry                                                                                                                                                                                                                                                                                                                                                                                                                                                    |
| Toxicity                                                            | Free field                                                                                                                                              | Prompt entry if previous option (Late CTCAE toxicity) is ticked<br><br>Note to data collector:<br><a href="https://ctep.cancer.gov/protocoldevelopment/electronic_applications/ctc.htm">https://ctep.cancer.gov/protocoldevelopment/electronic_applications/ctc.htm</a><br><br>Use the following format: System class organ (SOC)-CTCAE term-grade e.g. nervous system disorders-headache-1. Select the complication with the highest toxicity grade              |
| Meningioma progression/regrowth                                     | Checkbox                                                                                                                                                | Required                                                                                                                                                                                                                                                                                                                                                                                                                                                          |
| Scan date (at progression or last follow-up date if no progression) | DD/MM/YYYY                                                                                                                                              | Required                                                                                                                                                                                                                                                                                                                                                                                                                                                          |
| WHO PS at time of progression/last follow-up                        | Dropdown list/checkbox<br><ul style="list-style-type: none"> <li>• 0</li> <li>• 1</li> <li>• 2</li> <li>• 3</li> <li>• 4</li> <li>• 5 (dead)</li> </ul> | Required. Allow one option only                                                                                                                                                                                                                                                                                                                                                                                                                                   |
| <b>fRT (SECTION/PAGE 8)</b>                                         |                                                                                                                                                         |                                                                                                                                                                                                                                                                                                                                                                                                                                                                   |



|                                         |                                                                                                                                                                                                                                                                                                                                                                                                                                                                                                                                                              |                                                                                                                                                                                                                    |
|-----------------------------------------|--------------------------------------------------------------------------------------------------------------------------------------------------------------------------------------------------------------------------------------------------------------------------------------------------------------------------------------------------------------------------------------------------------------------------------------------------------------------------------------------------------------------------------------------------------------|--------------------------------------------------------------------------------------------------------------------------------------------------------------------------------------------------------------------|
| Pre-radiation WHO PS                    | Dropdown list/check box <ul style="list-style-type: none"> <li>• 0</li> <li>• 1</li> <li>• 2</li> <li>• 3</li> <li>• 4</li> </ul>                                                                                                                                                                                                                                                                                                                                                                                                                            | Required entry                                                                                                                                                                                                     |
| Pre-radiation comorbidity               | Check box <ul style="list-style-type: none"> <li>• Myocardial infarction</li> <li>• Congestive heart failure</li> <li>• Peripheral vascular disease</li> <li>• Hemiplegia</li> <li>• Cerebrovascular disease</li> <li>• Pulmonary disease</li> <li>• Diabetes</li> <li>• Renal disease</li> <li>• Liver disease</li> <li>• Peptic ulcer disease</li> <li>• Cancer</li> <li>• Dementia</li> <li>• Connective tissue disease</li> <li>• AIDS</li> <li>• Hypertension</li> <li>• Skin ulcers/cellulitis</li> <li>• Depression</li> <li>• On Warfarin</li> </ul> | Required entry. Allow multiple options.<br><br>Note to data collector: Age and comorbidities will be used to calculate the age adjusted Charlson comorbidity index. Each of these is defined in the guide provided |
| Number of fractions                     | Free field                                                                                                                                                                                                                                                                                                                                                                                                                                                                                                                                                   | Required entry                                                                                                                                                                                                     |
| Fractionated dose                       | Free field                                                                                                                                                                                                                                                                                                                                                                                                                                                                                                                                                   | Required entry                                                                                                                                                                                                     |
| Total dose                              | Free field                                                                                                                                                                                                                                                                                                                                                                                                                                                                                                                                                   | Required entry                                                                                                                                                                                                     |
| Early CTCAE toxicity ( $\leq 3$ months) | Checkbox                                                                                                                                                                                                                                                                                                                                                                                                                                                                                                                                                     | Required entry                                                                                                                                                                                                     |

|                                                                          |                                                                                                                                                         |                                                                                                                                                                                                                                                                                                                                                                                                                                                                   |
|--------------------------------------------------------------------------|---------------------------------------------------------------------------------------------------------------------------------------------------------|-------------------------------------------------------------------------------------------------------------------------------------------------------------------------------------------------------------------------------------------------------------------------------------------------------------------------------------------------------------------------------------------------------------------------------------------------------------------|
| Toxicity                                                                 | Free field                                                                                                                                              | Prompt entry if previous option (Early CTCAE toxicity (≤3 months)) is ticked<br><br>Note to data collector:<br><a href="https://ctep.cancer.gov/protocoldevelopment/electronic_applications/ctc.htm">https://ctep.cancer.gov/protocoldevelopment/electronic_applications/ctc.htm</a><br><br>Use the following format: System class organ (SOC)-CTCAE term-grade e.g. nervous system disorders-headache-1. Select the complication with the highest toxicity grade |
| Late CTCAE toxicity                                                      | Checkbox                                                                                                                                                | Required entry                                                                                                                                                                                                                                                                                                                                                                                                                                                    |
| Toxicity                                                                 | Free field                                                                                                                                              | Prompt entry if previous option (Late CTCAE toxicity) is ticked<br><br>Note to data collector:<br><a href="https://ctep.cancer.gov/protocoldevelopment/electronic_applications/ctc.htm">https://ctep.cancer.gov/protocoldevelopment/electronic_applications/ctc.htm</a><br><br>Use the following format: System class organ (SOC)-CTCAE term-grade e.g. nervous system disorders-headache-1. Select the complication with the highest toxicity grade              |
| Meningioma progression/regrowth                                          | Checkbox                                                                                                                                                | Required                                                                                                                                                                                                                                                                                                                                                                                                                                                          |
| Scan date (at progression or last follow-up date if no progression)      | DD/MM/YYYY                                                                                                                                              | Required                                                                                                                                                                                                                                                                                                                                                                                                                                                          |
| WHO PS at time of progression/last follow-up                             | Dropdown list/checkbox<br><ul style="list-style-type: none"> <li>• 0</li> <li>• 1</li> <li>• 2</li> <li>• 3</li> <li>• 4</li> <li>• 5 (dead)</li> </ul> | Required. Allow one option only                                                                                                                                                                                                                                                                                                                                                                                                                                   |
| <b>Discharge from outpatient care/Lost to follow-up (SECTION/PAGE 9)</b> |                                                                                                                                                         |                                                                                                                                                                                                                                                                                                                                                                                                                                                                   |

|                                                                                   |                                                                                                                                                                                              |                                                                                                                                                                                                                                                                       |
|-----------------------------------------------------------------------------------|----------------------------------------------------------------------------------------------------------------------------------------------------------------------------------------------|-----------------------------------------------------------------------------------------------------------------------------------------------------------------------------------------------------------------------------------------------------------------------|
| Date of data entry into the database                                              | DD/MM/YYYY                                                                                                                                                                                   | Required entry                                                                                                                                                                                                                                                        |
| Rescanned during the time between discharge/loss to FU and the date of data entry | Checkbox                                                                                                                                                                                     | Required entry                                                                                                                                                                                                                                                        |
| Date of scan                                                                      | DD/MM/YYYY                                                                                                                                                                                   | Prompt entry if previous option (Readmitted/rescanned during the time between discharge/loss to FU and the date of data entry) has been checked                                                                                                                       |
| Reason?                                                                           | Dropdown list: <ul style="list-style-type: none"> <li>• Seizure</li> <li>• Headache</li> <li>• Motor</li> <li>• Sensory</li> <li>• Language</li> <li>• Cognitive</li> <li>• Other</li> </ul> | Prompt entry if previous option (Readmitted/rescanned during the time between discharge/loss to FU and the date of data entry) has been checked. Allow multiple options                                                                                               |
| Peritumoural signal intensity on T2                                               | Dropdown list/check box <ul style="list-style-type: none"> <li>• 0-5%</li> <li>• 6-33%</li> <li>• 34-66%</li> <li>• 67-100%</li> <li>• NA</li> </ul>                                         | Prompt entry if previous option (Readmitted/rescanned during the time between discharge/loss to FU and the date of data entry) has been checked. Allow one option only<br><br>Note to data collector: In relation to tumour volume. If only baseline CT available, NA |
| Peritumoural signal intensity on FLAIR                                            | Dropdown list: <ul style="list-style-type: none"> <li>• 0-5%</li> <li>• 6-33%</li> <li>• 34-66%</li> <li>• 67-100%</li> <li>• NA</li> </ul>                                                  | Prompt entry if previous option (Readmitted/rescanned during the time between discharge/loss to FU and the date of data entry) has been checked. Allow one option only<br><br>Note to data collector: In relation to tumour volume. If only baseline CT available, NA |
| Venous sinus nearby                                                               | Checkbox <ul style="list-style-type: none"> <li>• Superior sagittal sinus</li> <li>• Cavernous sinus</li> </ul>                                                                              | Prompt entry if previous option (Readmitted/rescanned during the time between discharge/loss to FU and the date of data entry) has been checked                                                                                                                       |

|                                      |                                                                                                                                   |                                                                                                                                                                                                                                                       |
|--------------------------------------|-----------------------------------------------------------------------------------------------------------------------------------|-------------------------------------------------------------------------------------------------------------------------------------------------------------------------------------------------------------------------------------------------------|
|                                      | <ul style="list-style-type: none"> <li>• Sigmoid sinus</li> <li>• Transverse sinus</li> <li>• Confluence of sinuses</li> </ul>    | Note to data collector: Tick box if within 10 mm, in direct contact or invading one of: superior sagittal sinus (SSS), sigmoid sinus (SS), transverse sinus (TS), cavernous sinus (CS) and the confluence of sinuses (CoS)                            |
| If yes, specify                      | Dropdown list/check box                                                                                                           | Prompt entry if previous option (venous sinus nearby) has been ticked. Allow one option only                                                                                                                                                          |
| Separate, direct contact or invaded? | Dropdown list/check box <ul style="list-style-type: none"> <li>• Separate</li> <li>• Direct contact</li> <li>• Invaded</li> </ul> | Prompt entry if previous option (venous sinus nearby) has been ticked. Allow one option only                                                                                                                                                          |
| Major axis (mm)                      | Free field                                                                                                                        | Prompt entry if previous option (Readmitted/rescanned during the time between discharge/loss to FU and the date of data entry) has been checked<br><br>Note to data collector: In mm to 1 dp. Measure on axial T1/CT + GAD                            |
| Minor axis (mm)                      | Free field                                                                                                                        | Prompt entry if previous option (Readmitted/rescanned during the time between discharge/loss to FU and the date of data entry) has been checked<br><br>Note to data collector: In mm to 1 dp. Perpendicular to the major axis on axial T1/CT + GAD    |
| Cor/sag major axis (mm)              | Free field                                                                                                                        | Prompt entry if previous option (Readmitted/rescanned during the time between discharge/loss to FU and the date of data entry) has been checked<br><br>Note to data collector: In mm to 1 dp. Maximum height                                          |
| Verdict                              | Dropdown list/checkbox <ul style="list-style-type: none"> <li>• Related</li> <li>• Unrelated</li> </ul>                           | Prompt entry if previous option (Readmitted/rescanned during the time between discharge/loss to FU and the date of data entry) has been checked. Allow one option only<br><br>Note to data collector: Were the symptoms attributed to the meningioma? |
| Outcome                              | Dropdown list/Checkbox                                                                                                            | Prompt entry if previous option (Readmitted/rescanned during the time between discharge/loss to FU and the date of data entry) has been checked. Allow one option only                                                                                |

|                                    |                                                                                                                                                                                                             |                                                                                                                                                                                                                                                                                                                                                                                                                                                              |
|------------------------------------|-------------------------------------------------------------------------------------------------------------------------------------------------------------------------------------------------------------|--------------------------------------------------------------------------------------------------------------------------------------------------------------------------------------------------------------------------------------------------------------------------------------------------------------------------------------------------------------------------------------------------------------------------------------------------------------|
|                                    | <ul style="list-style-type: none"> <li>Resume follow-up (active monitoring)</li> <li>Surgery</li> <li>SRS</li> <li>fRT</li> <li>Discharge</li> <li><u>Lost to follow-up</u></li> <li><u>Dead</u></li> </ul> | Note to data collector: You will be directed to the relevant page/section dependent on the choice. If the patient died or was lost to follow-up after this interval scan, please choose one of the last two options, albeit the intention might have been to continue monitoring or intervene. If the option you choose is set to take place in the future, choose the option, save the data entered and exit the form with no further information required. |
| Overall outcome                    | Dropdown list/Checkbox: <ul style="list-style-type: none"> <li>Dead</li> <li>Alive</li> </ul>                                                                                                               | Prompt entry if previous option (Rescanned during the time between discharge/loss to FU and the date of data entry) is not ticked.<br><br>Allow one option only<br><br>Note to data collector: You will be directed to section 10 if Dead is selected.                                                                                                                                                                                                       |
| <b>Mortality (SECTION/PAGE 10)</b> |                                                                                                                                                                                                             |                                                                                                                                                                                                                                                                                                                                                                                                                                                              |
| Date of death                      | DD/MM/YYYY                                                                                                                                                                                                  | Required entry                                                                                                                                                                                                                                                                                                                                                                                                                                               |
| Cause of death                     | Dropdown list/checkbox <ul style="list-style-type: none"> <li>Meningioma-related</li> <li>Unrelated</li> </ul>                                                                                              | Required entry. Allow one option only<br><br>Note to data collector: An example of a meningioma-related death would be for example status epilepticus in a patient who manifested seizures but didn't have treatment. An unrelated death would be for example a community acquired pneumonia. For the purpose of the study, any death occurring from a morbidity, which did not necessitate neurosurgical input/opinion will be classified as unrelated      |

1.2. Appendix. 2. ICOM classification of meningioma location

| ICOM classification system of meningioma locations |                                                   |                        |                                       |
|----------------------------------------------------|---------------------------------------------------|------------------------|---------------------------------------|
| Main category                                      | Subcategories                                     |                        |                                       |
| <b>Convexity</b>                                   | Anterior <sup>1</sup>                             | Posterior <sup>1</sup> |                                       |
| <b>Parasagittal</b>                                | Anterior <sup>1</sup>                             | Posterior <sup>1</sup> | Falco-tentorial                       |
| <b>Parafalcine</b>                                 | Anterior <sup>1</sup>                             | Posterior <sup>1</sup> | Falco-tentorial                       |
| <b>Sphenoid wing</b>                               | Lateral                                           | Medial (including ACP) |                                       |
| <b>Anterior midline</b>                            | Cribriform plate or olfactory groove <sup>2</sup> | Planum <sup>3</sup>    | Tuberculum and diaphragma sellae      |
| <b>Posterior fossa - midline</b>                   | Clival                                            | Petro-clival           | Anterior foramen magnum <sup>4</sup>  |
| <b>Posterior fossa – Lateral &amp; posterior</b>   | Petrous                                           | Squamous occipital     | Posterior foramen magnum <sup>4</sup> |
| <b>Tentorial</b>                                   | Supratentorial                                    | Infratentorial         |                                       |
| <b>Intraventricular</b>                            |                                                   |                        |                                       |
| <b>Pineal region<sup>5</sup></b>                   |                                                   |                        |                                       |

<sup>1</sup> The main attachment is located anterior or posterior, respectively, to the coronal suture

<sup>2</sup> Arising between the crista galli and the fronto-sphenoid suture

<sup>3</sup> Arising between the fronto-sphenoid suture and the limbus sphenoidale

<sup>4</sup> The main attachment is located anterior or posterior, respectively, to the hypoglossal canal

<sup>5</sup> No obvious tentorial attachment
